# Supplementary material for: Metabolic profiling of Apostichopus japonicus body wall exposed to a typical type of PBDEs: potential health risks and impact on sea cucumber health
Source: Frontiers journal article supplement (doi:10.3389/fmars.2023.1205538), 2023-09-28
Supplement: Data_Sheet_2.docx [file Data_Sheet_2.docx]

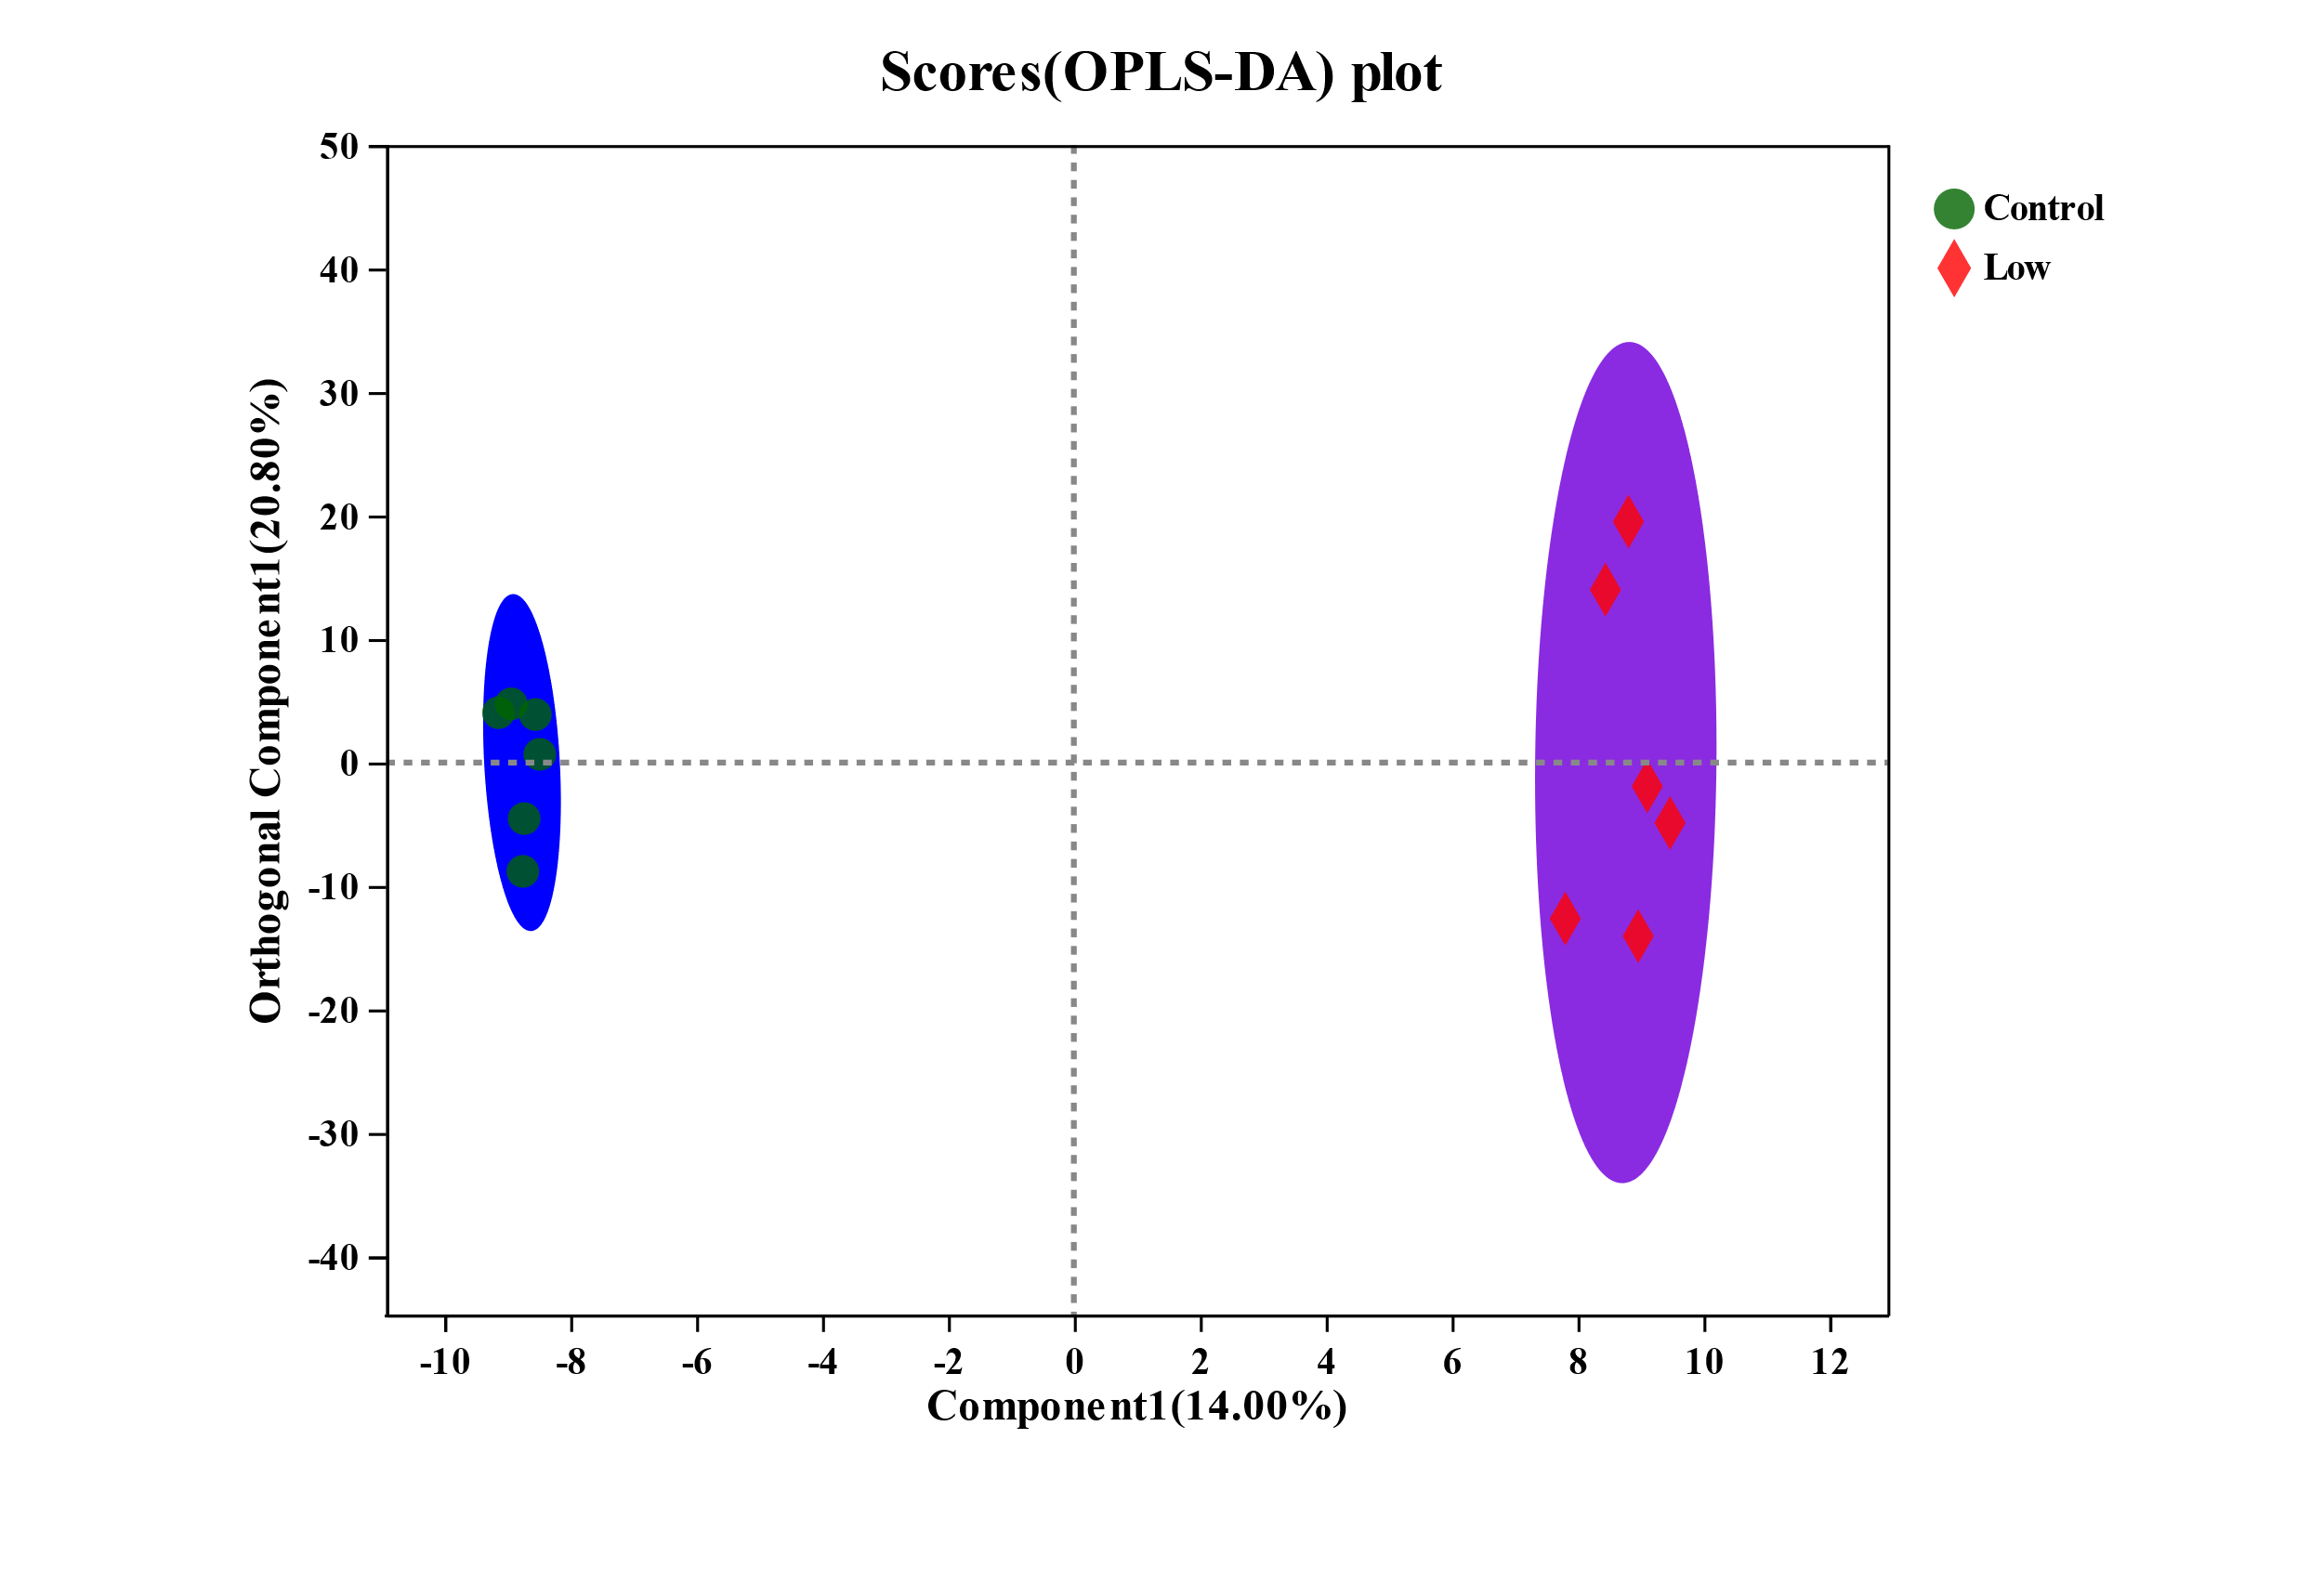

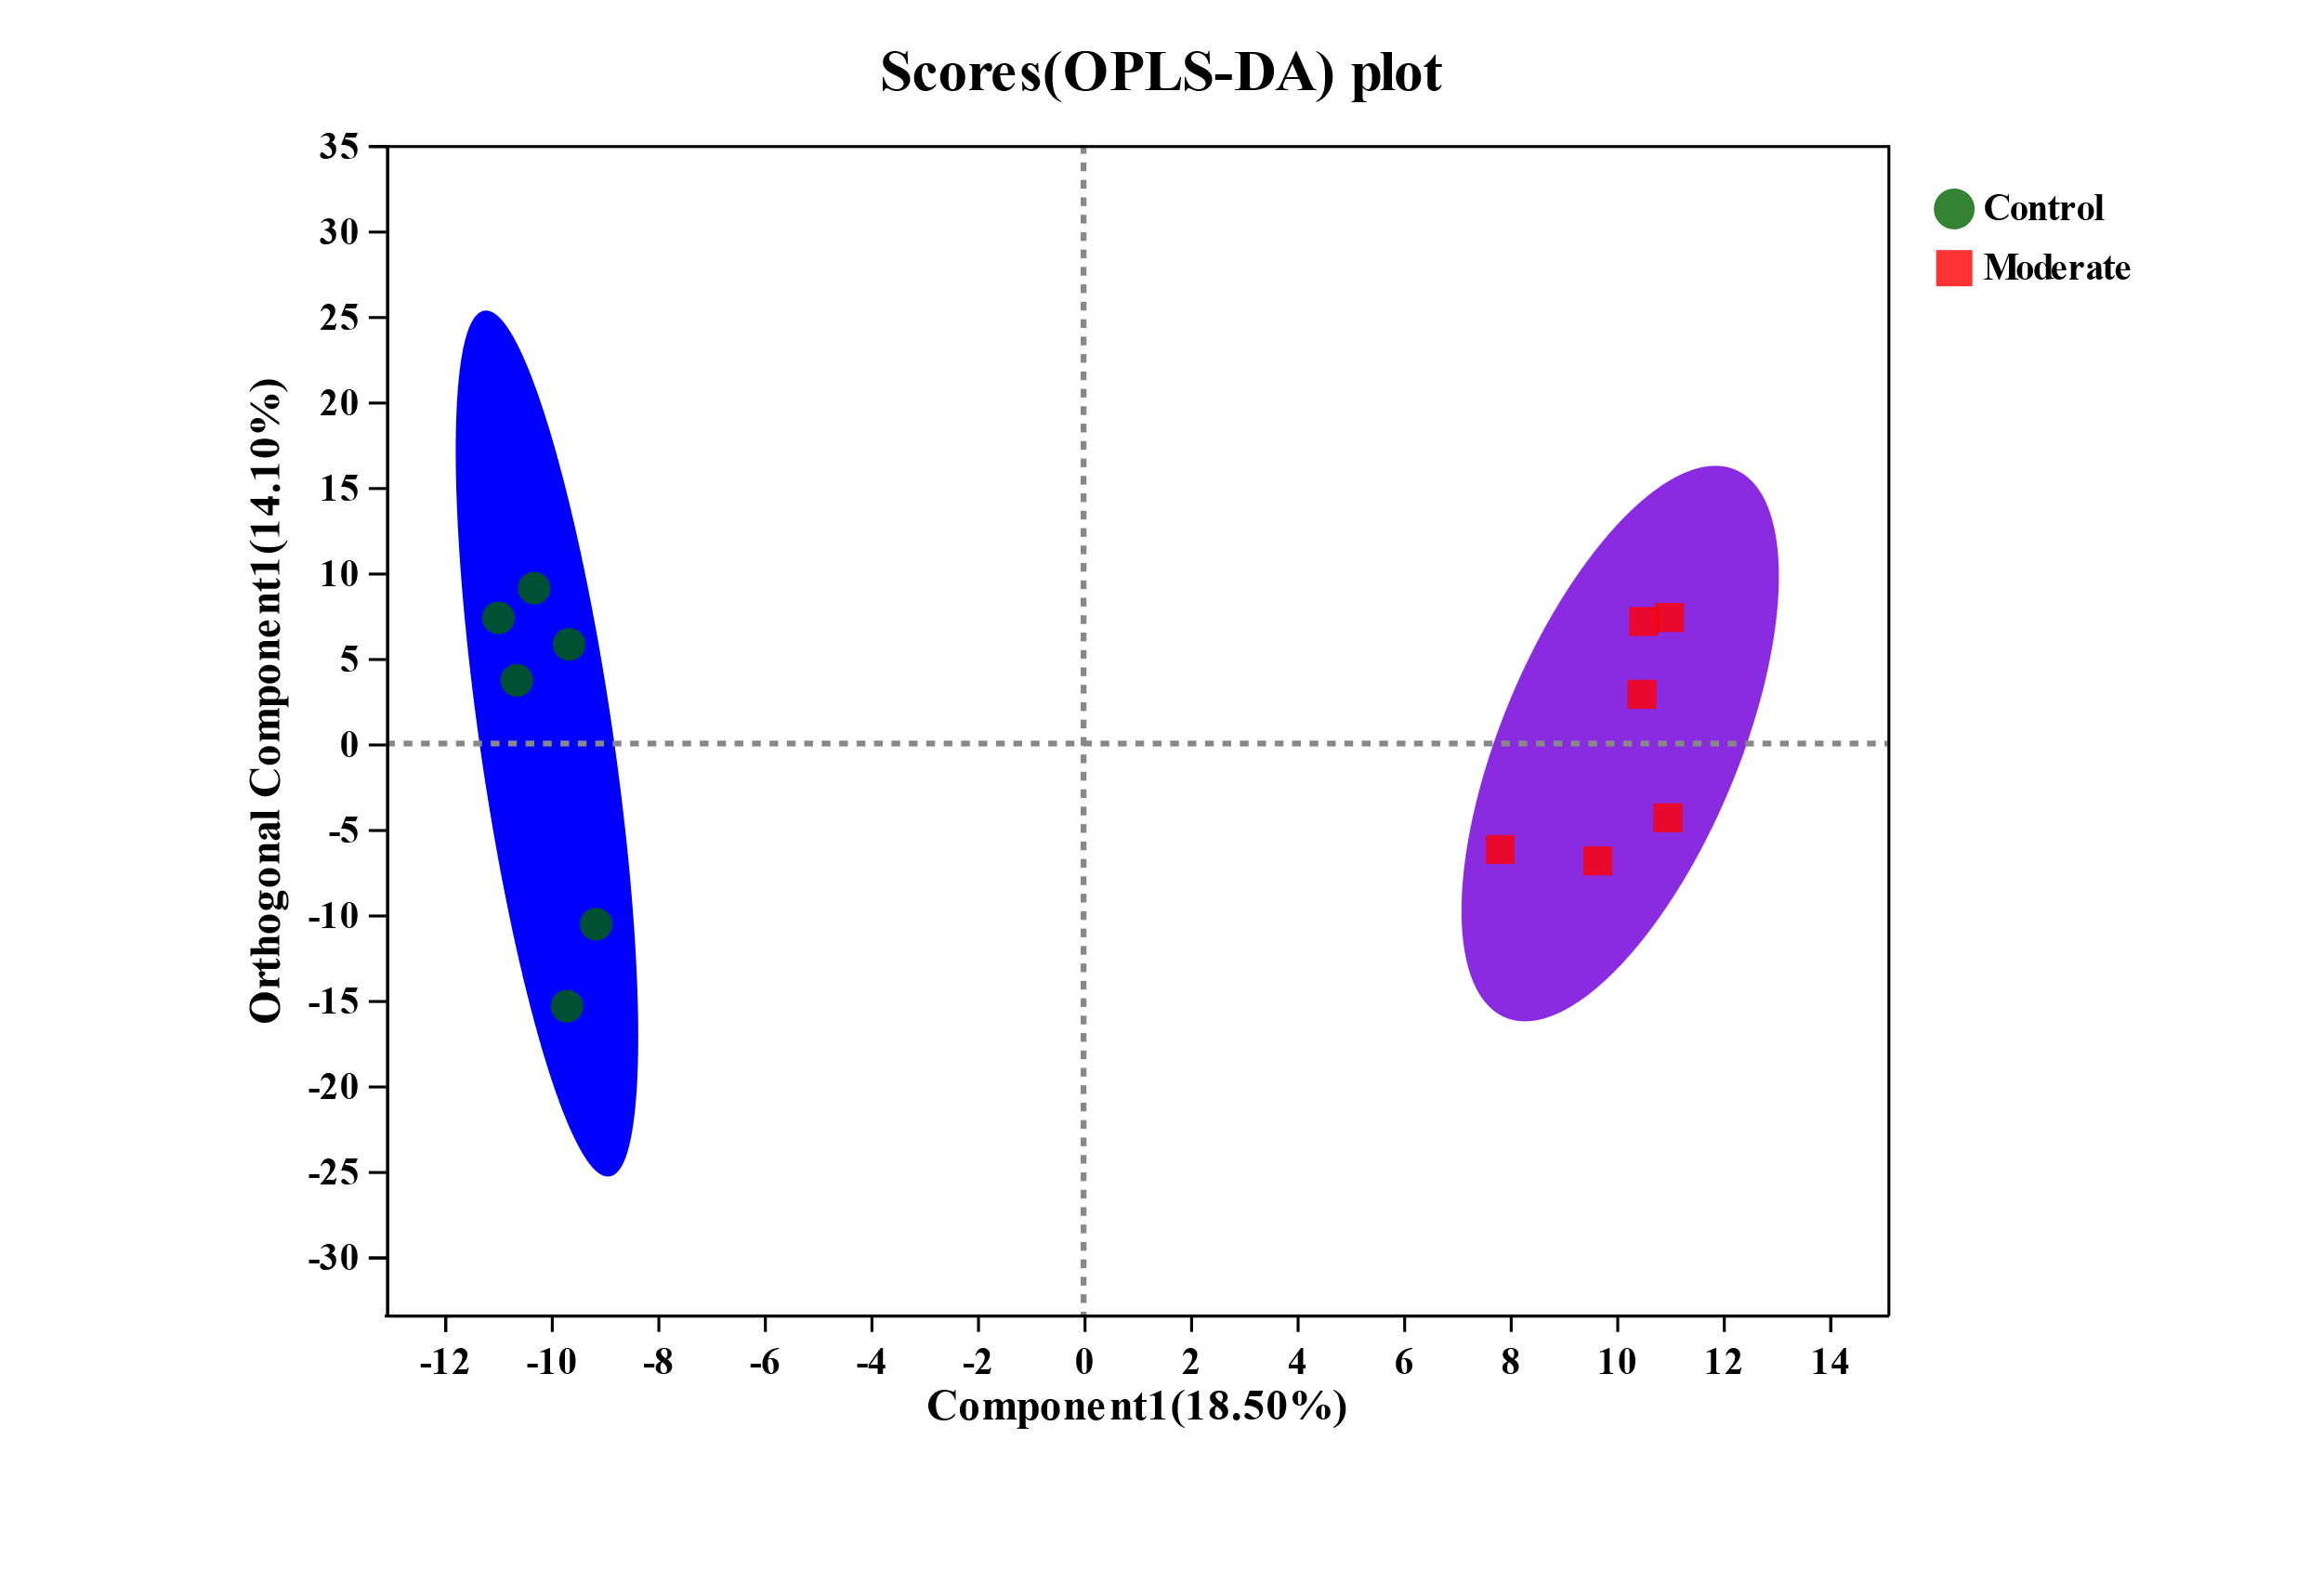


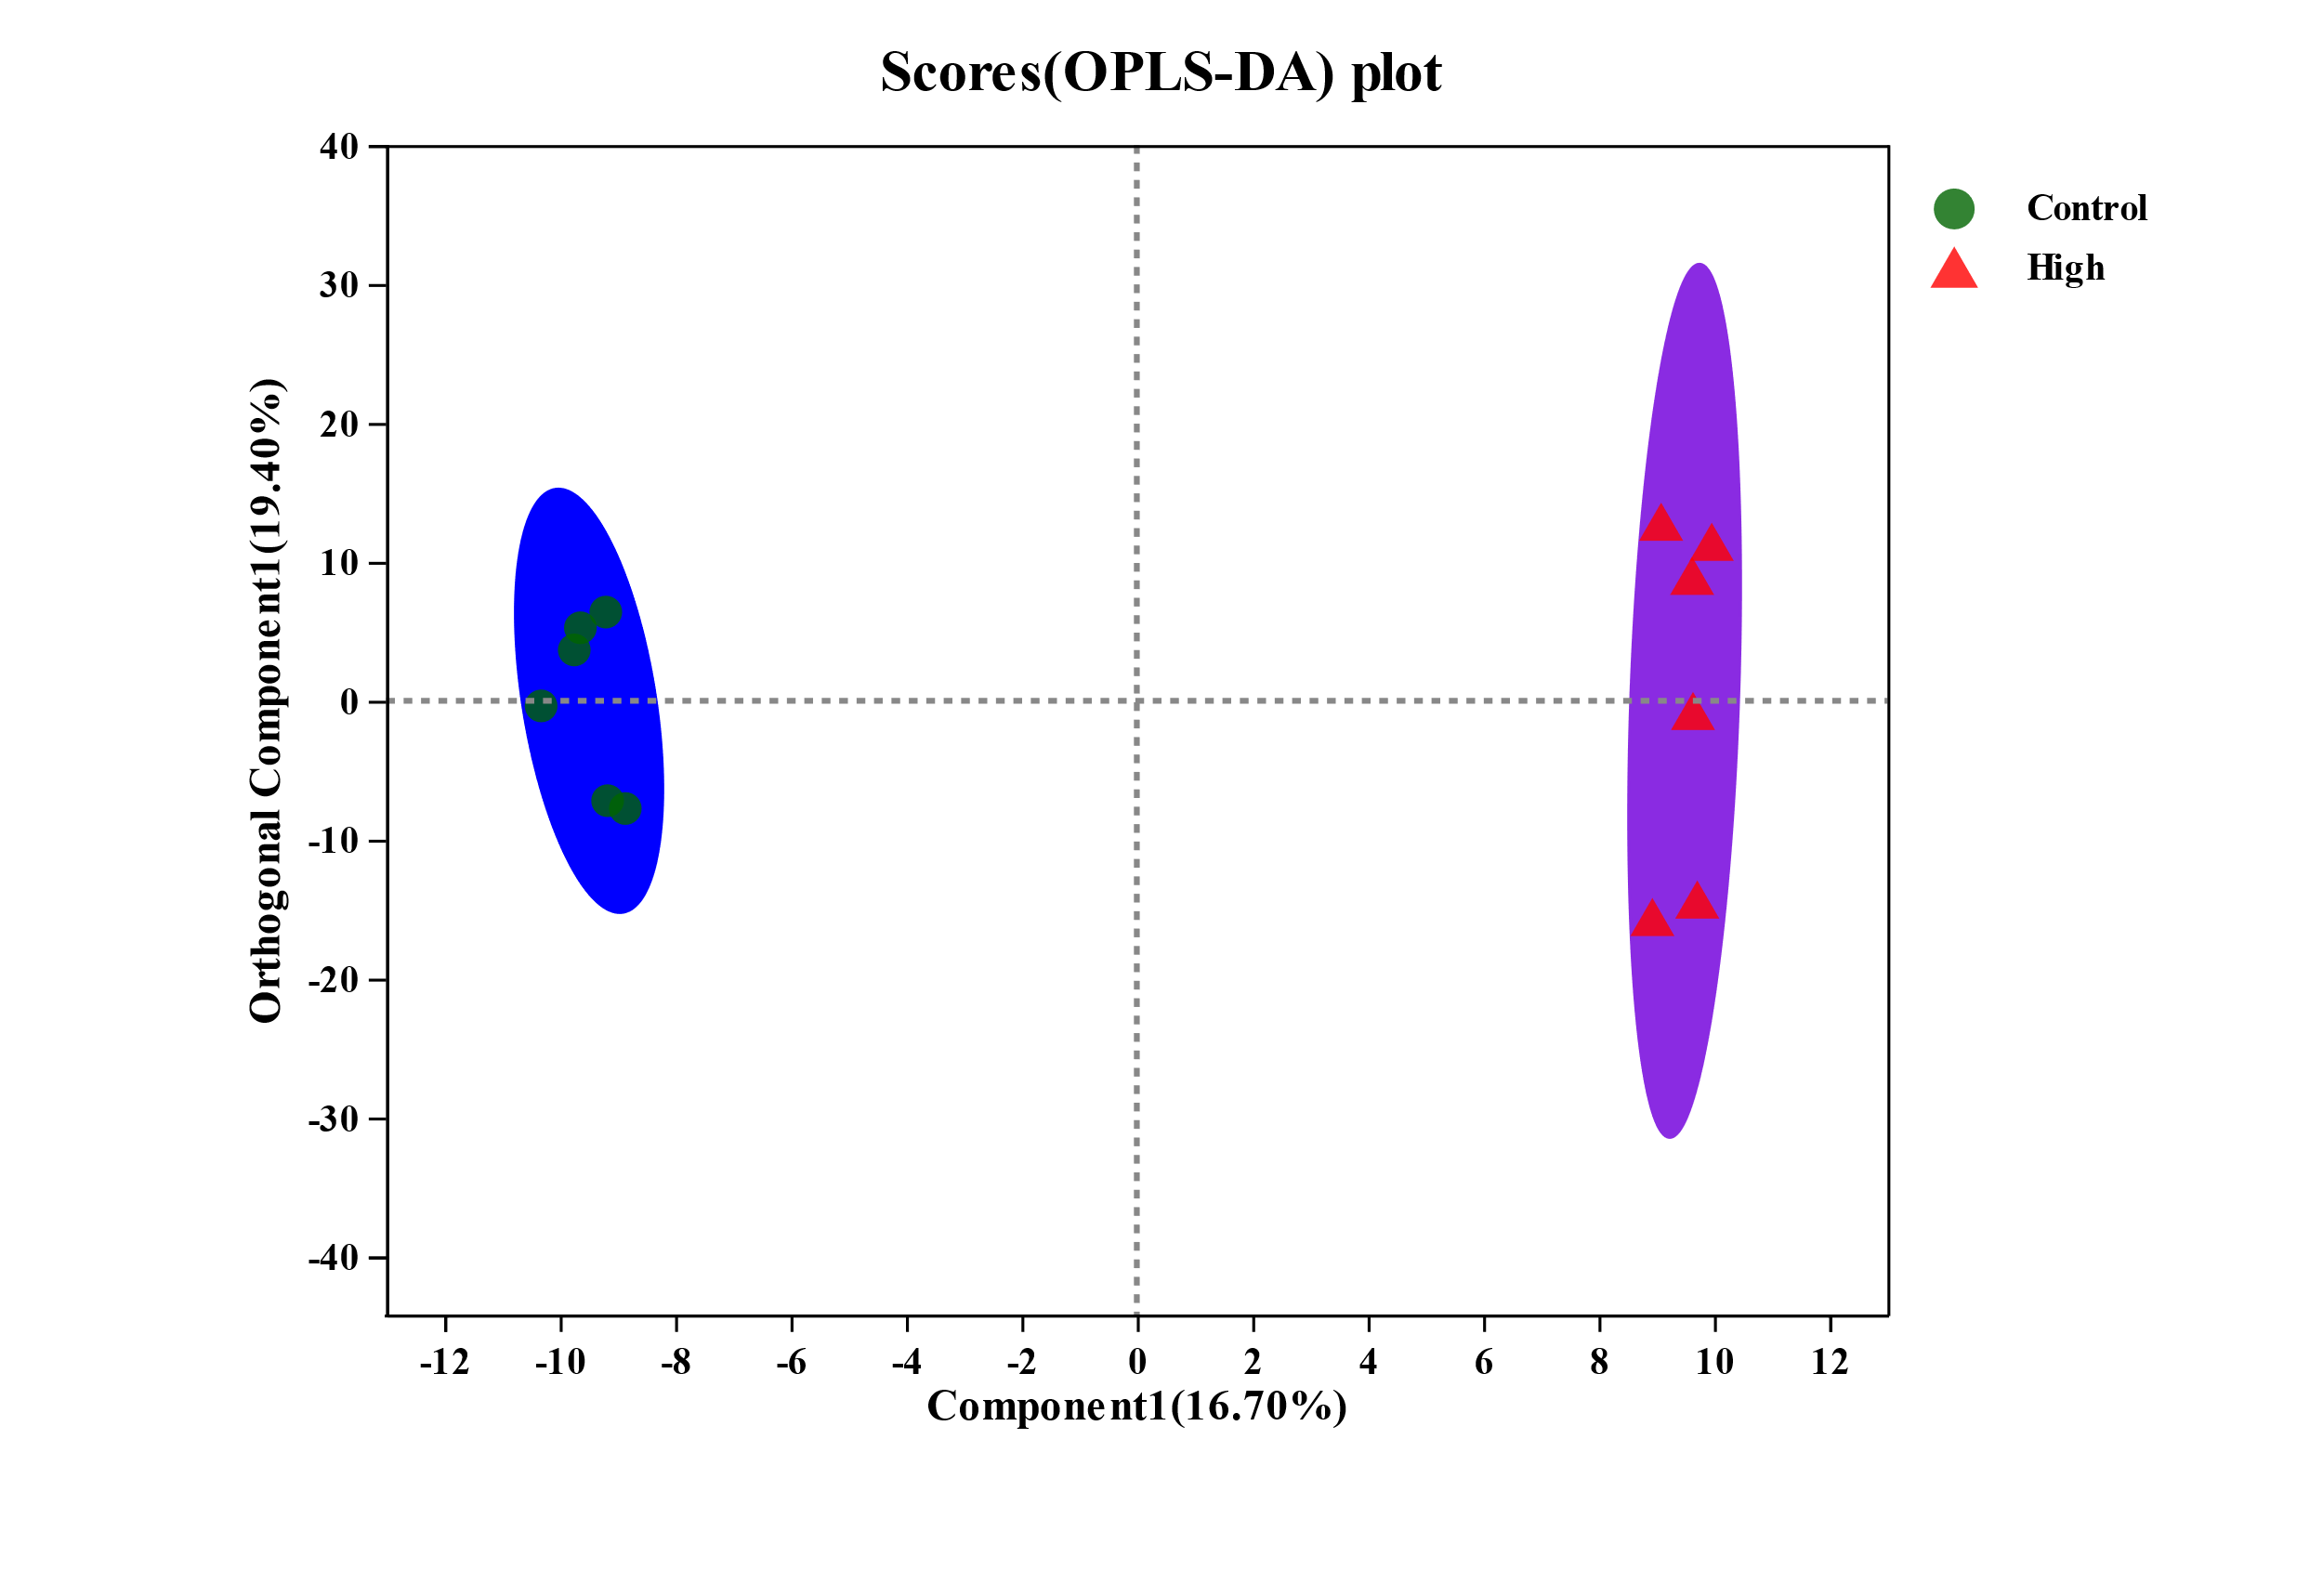

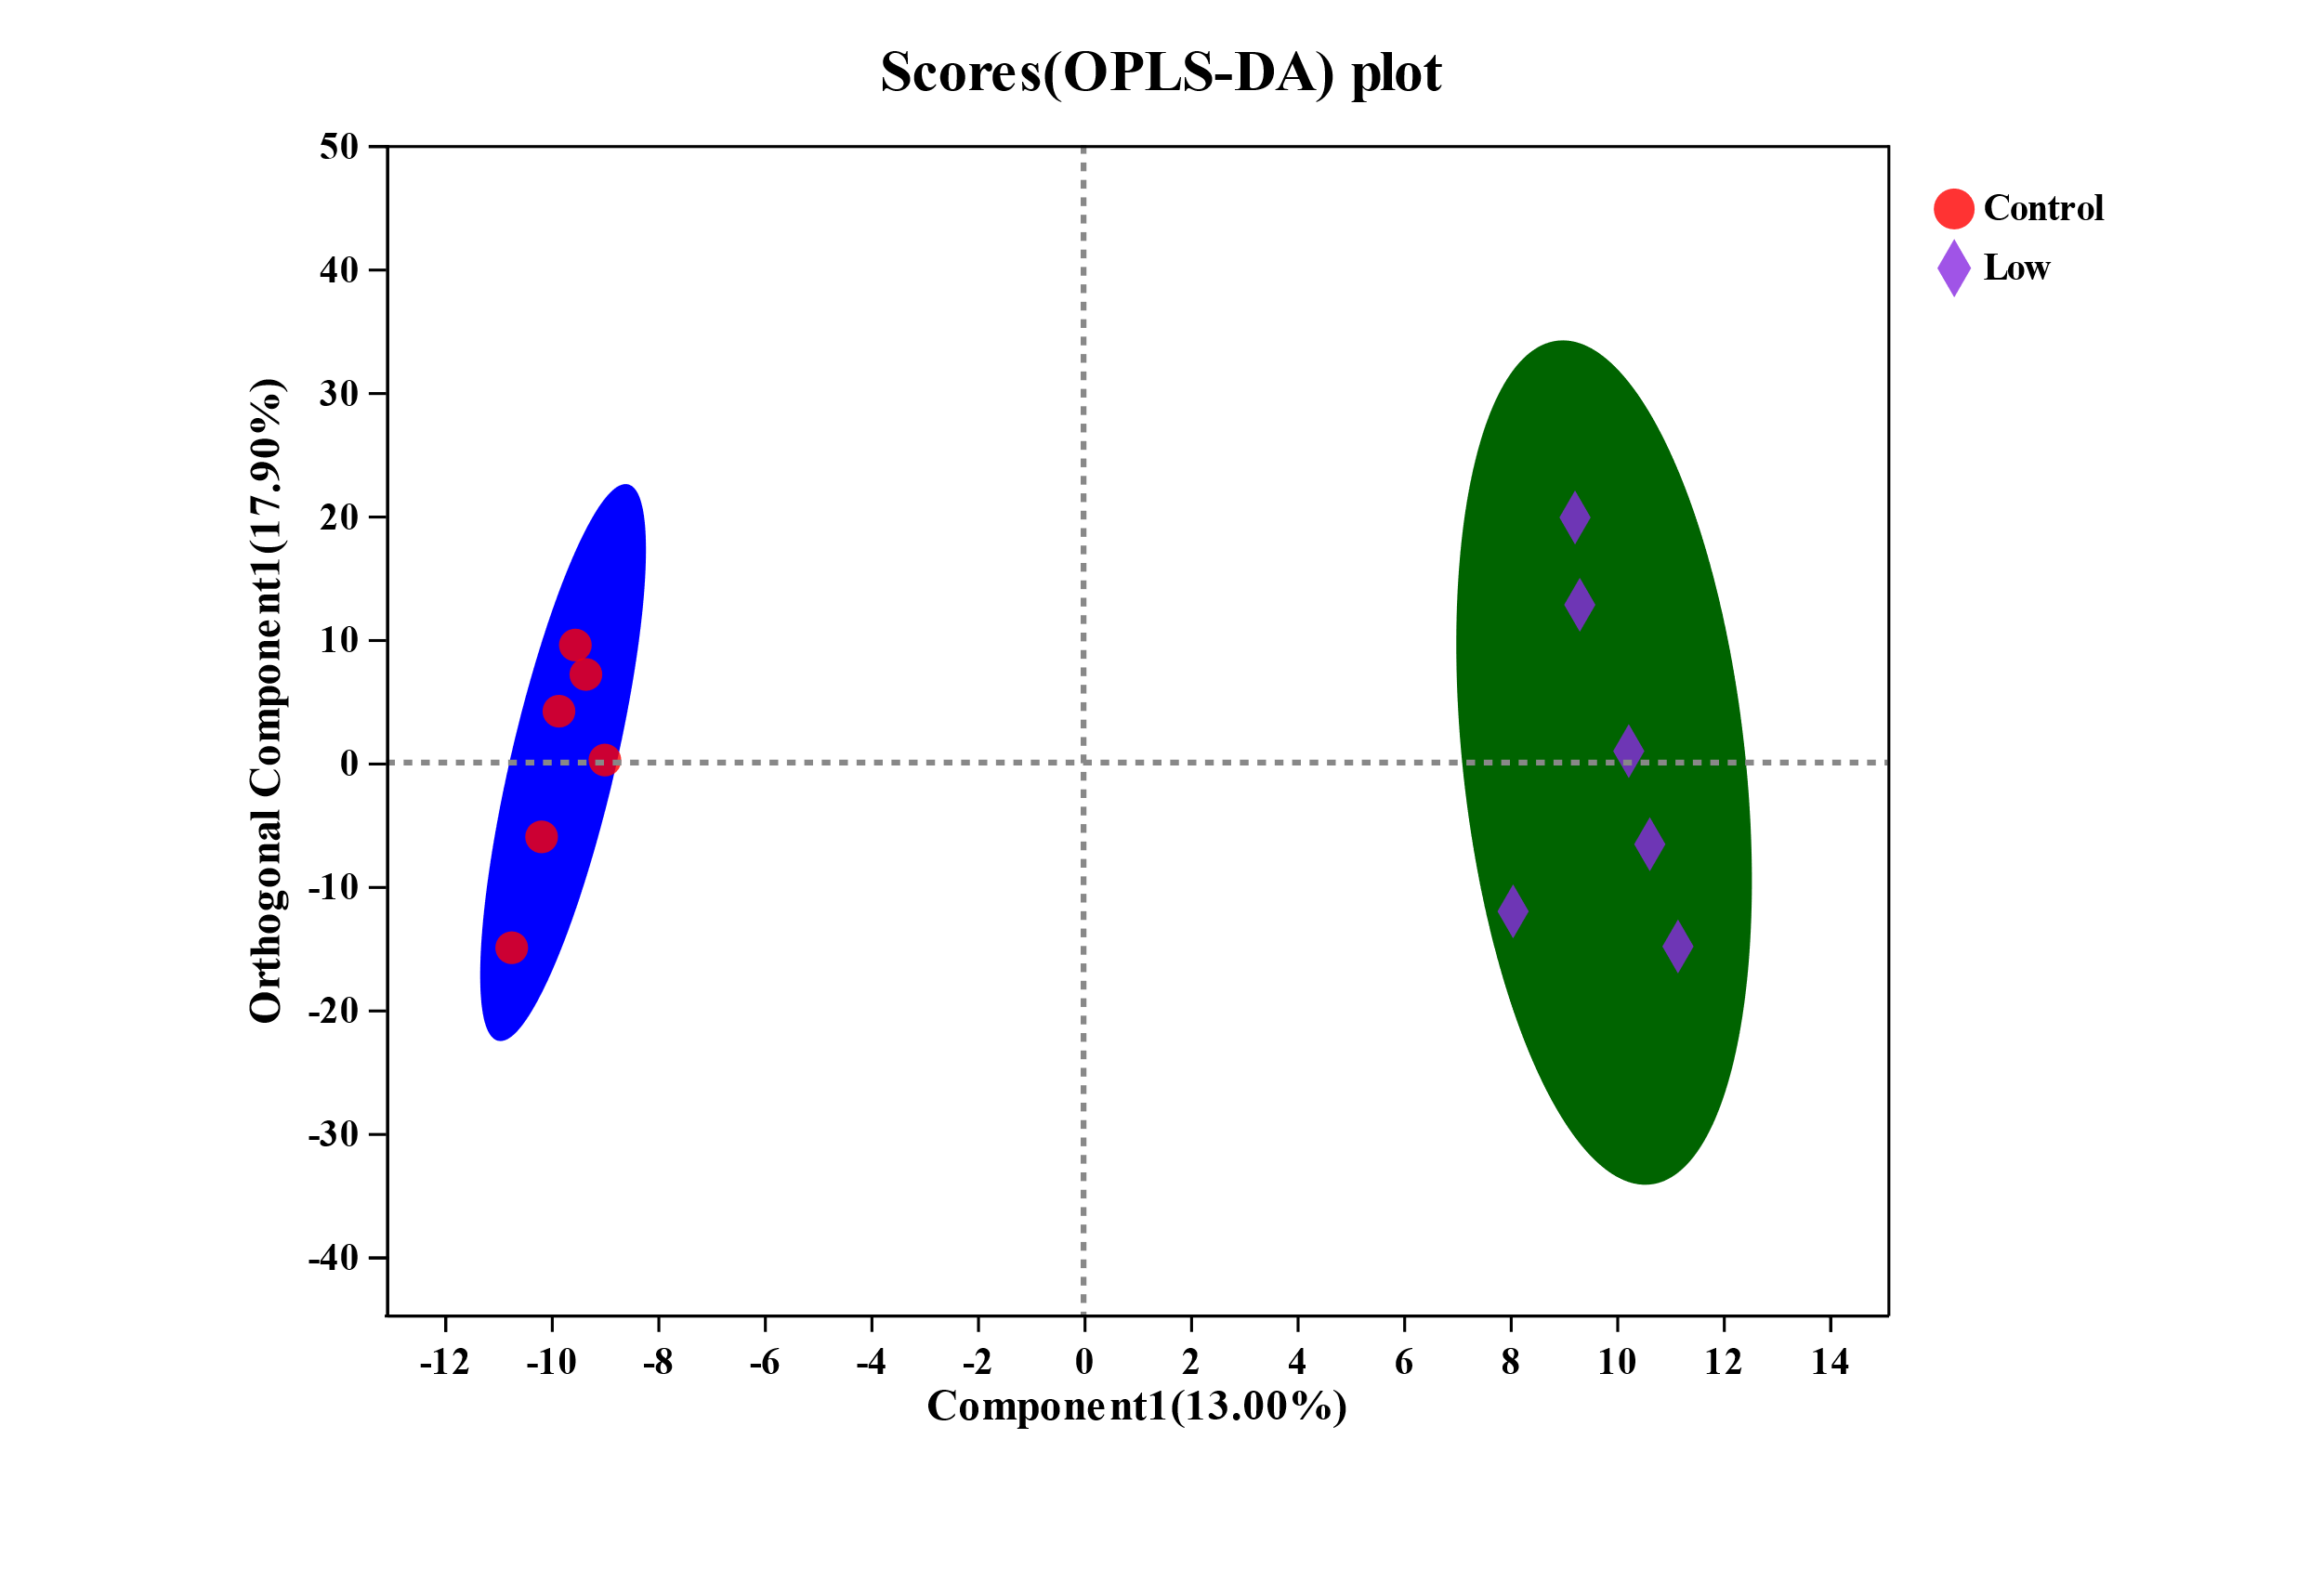


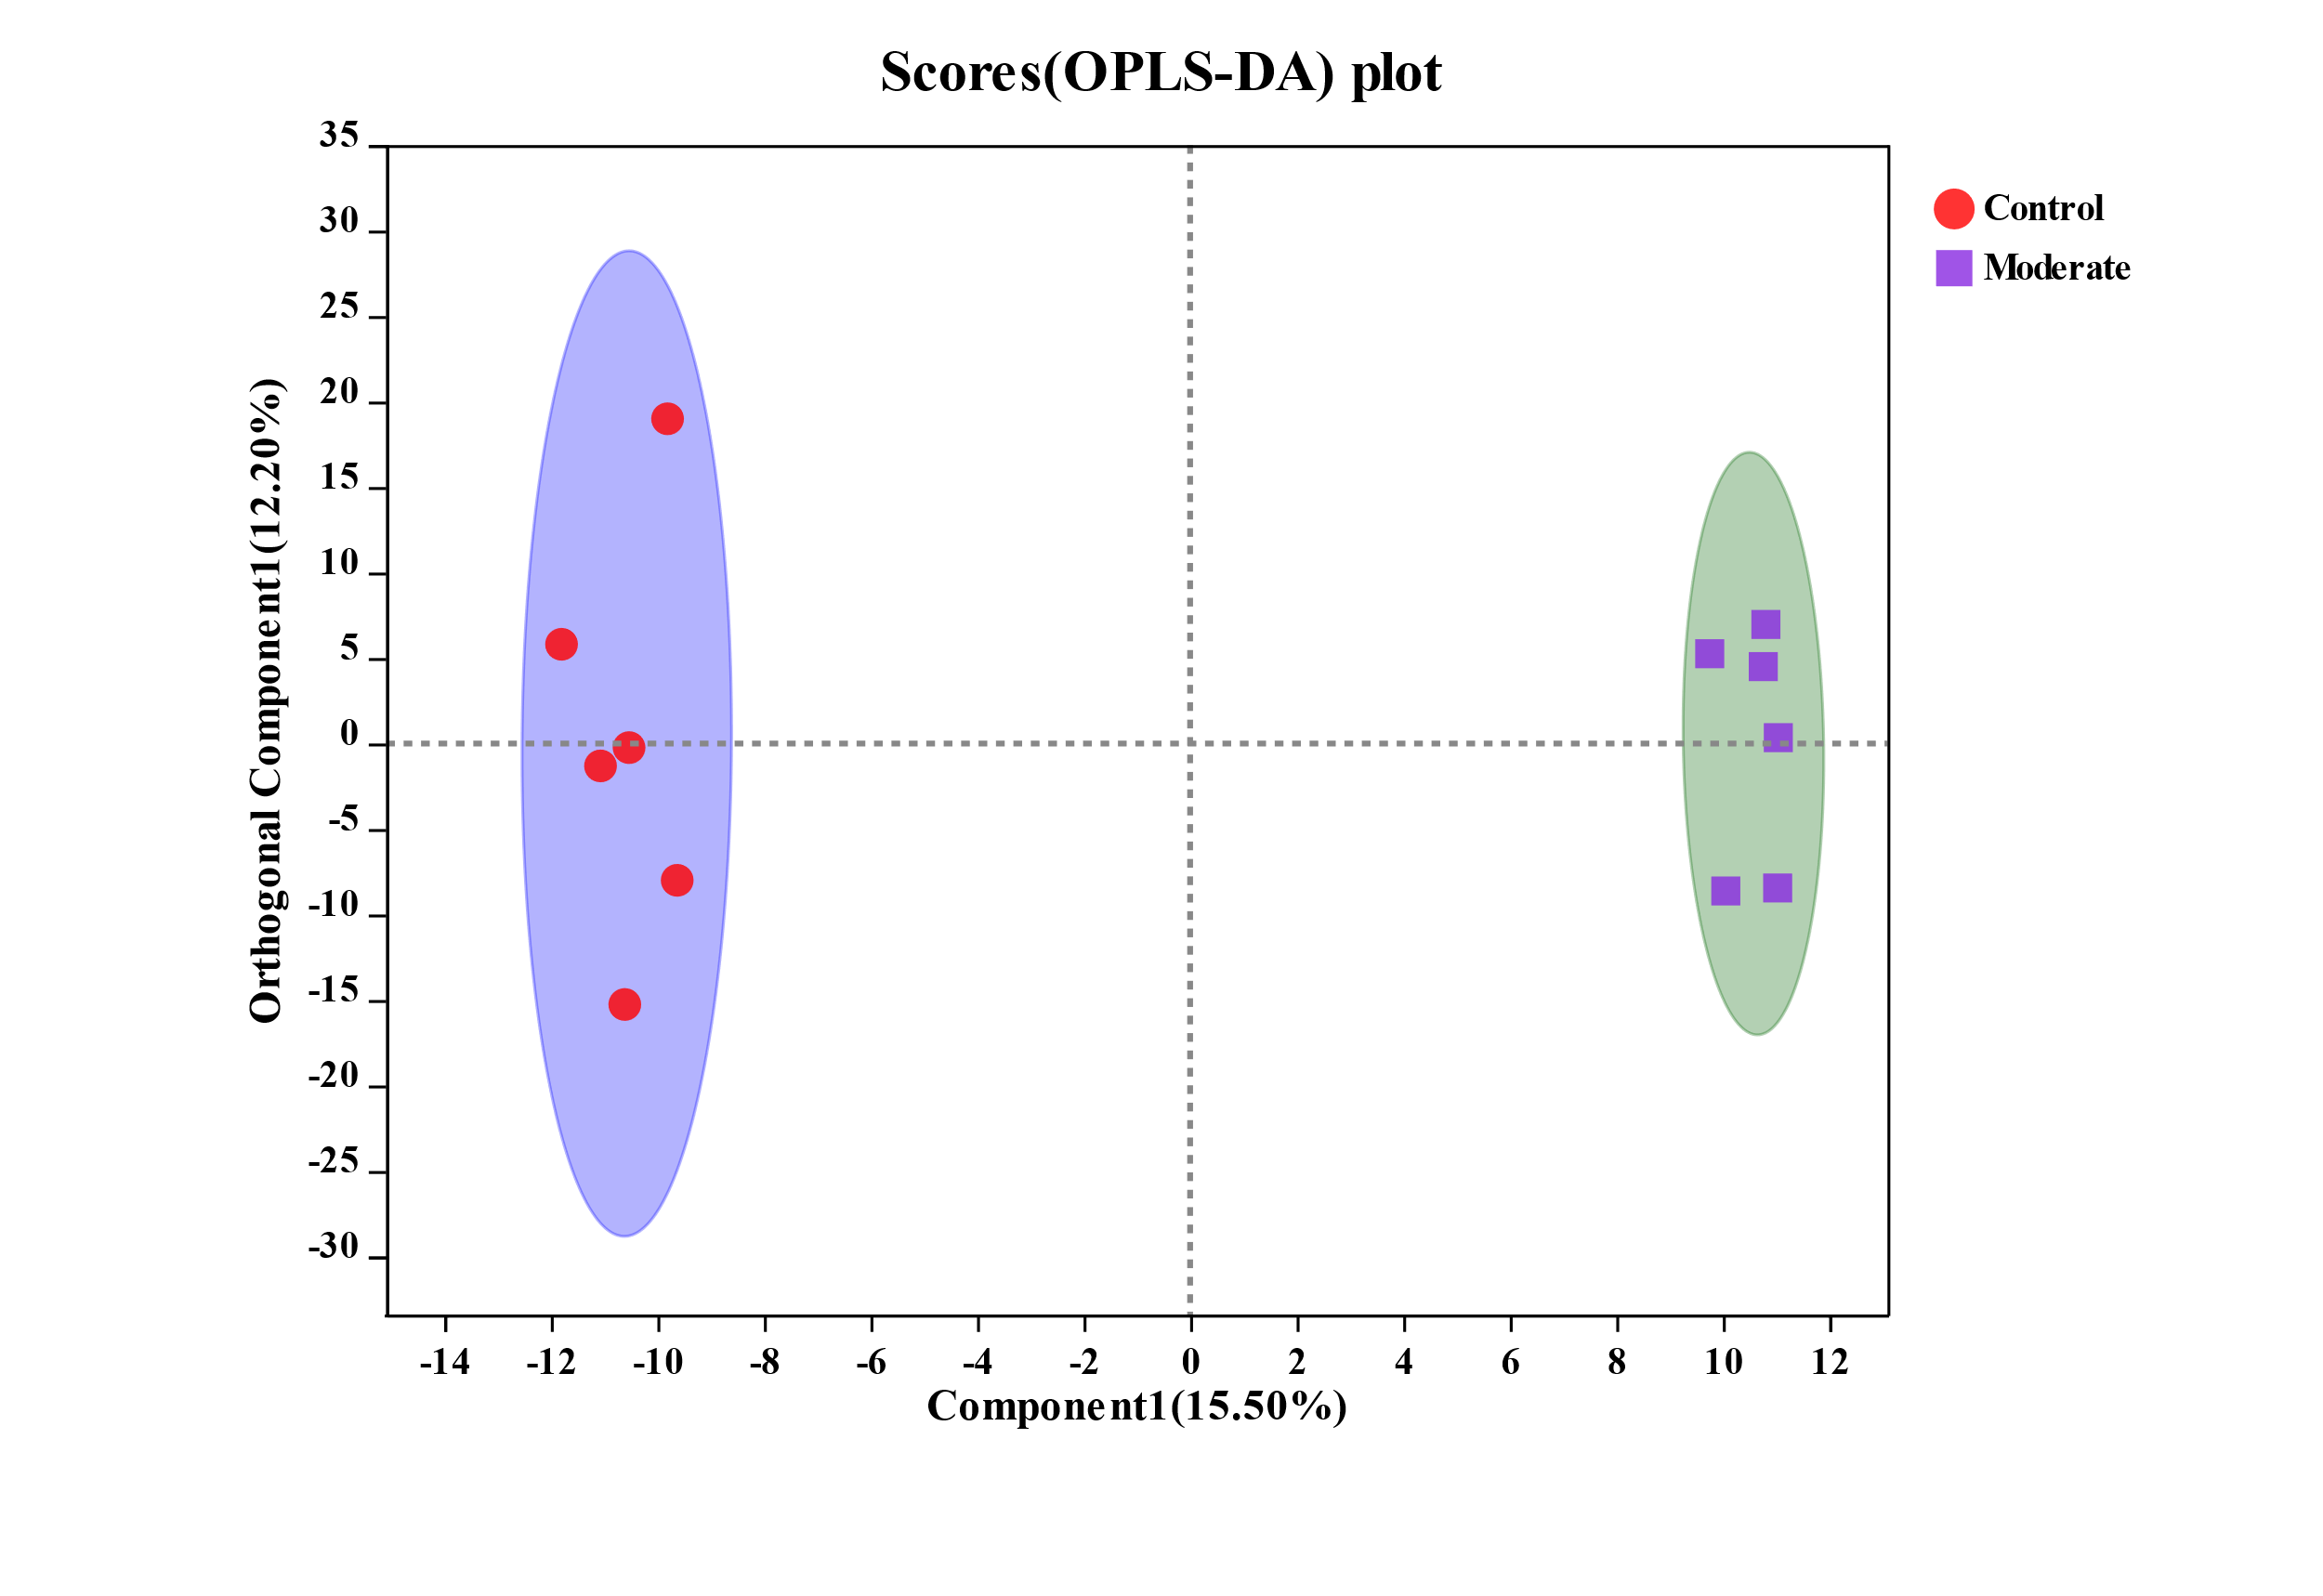

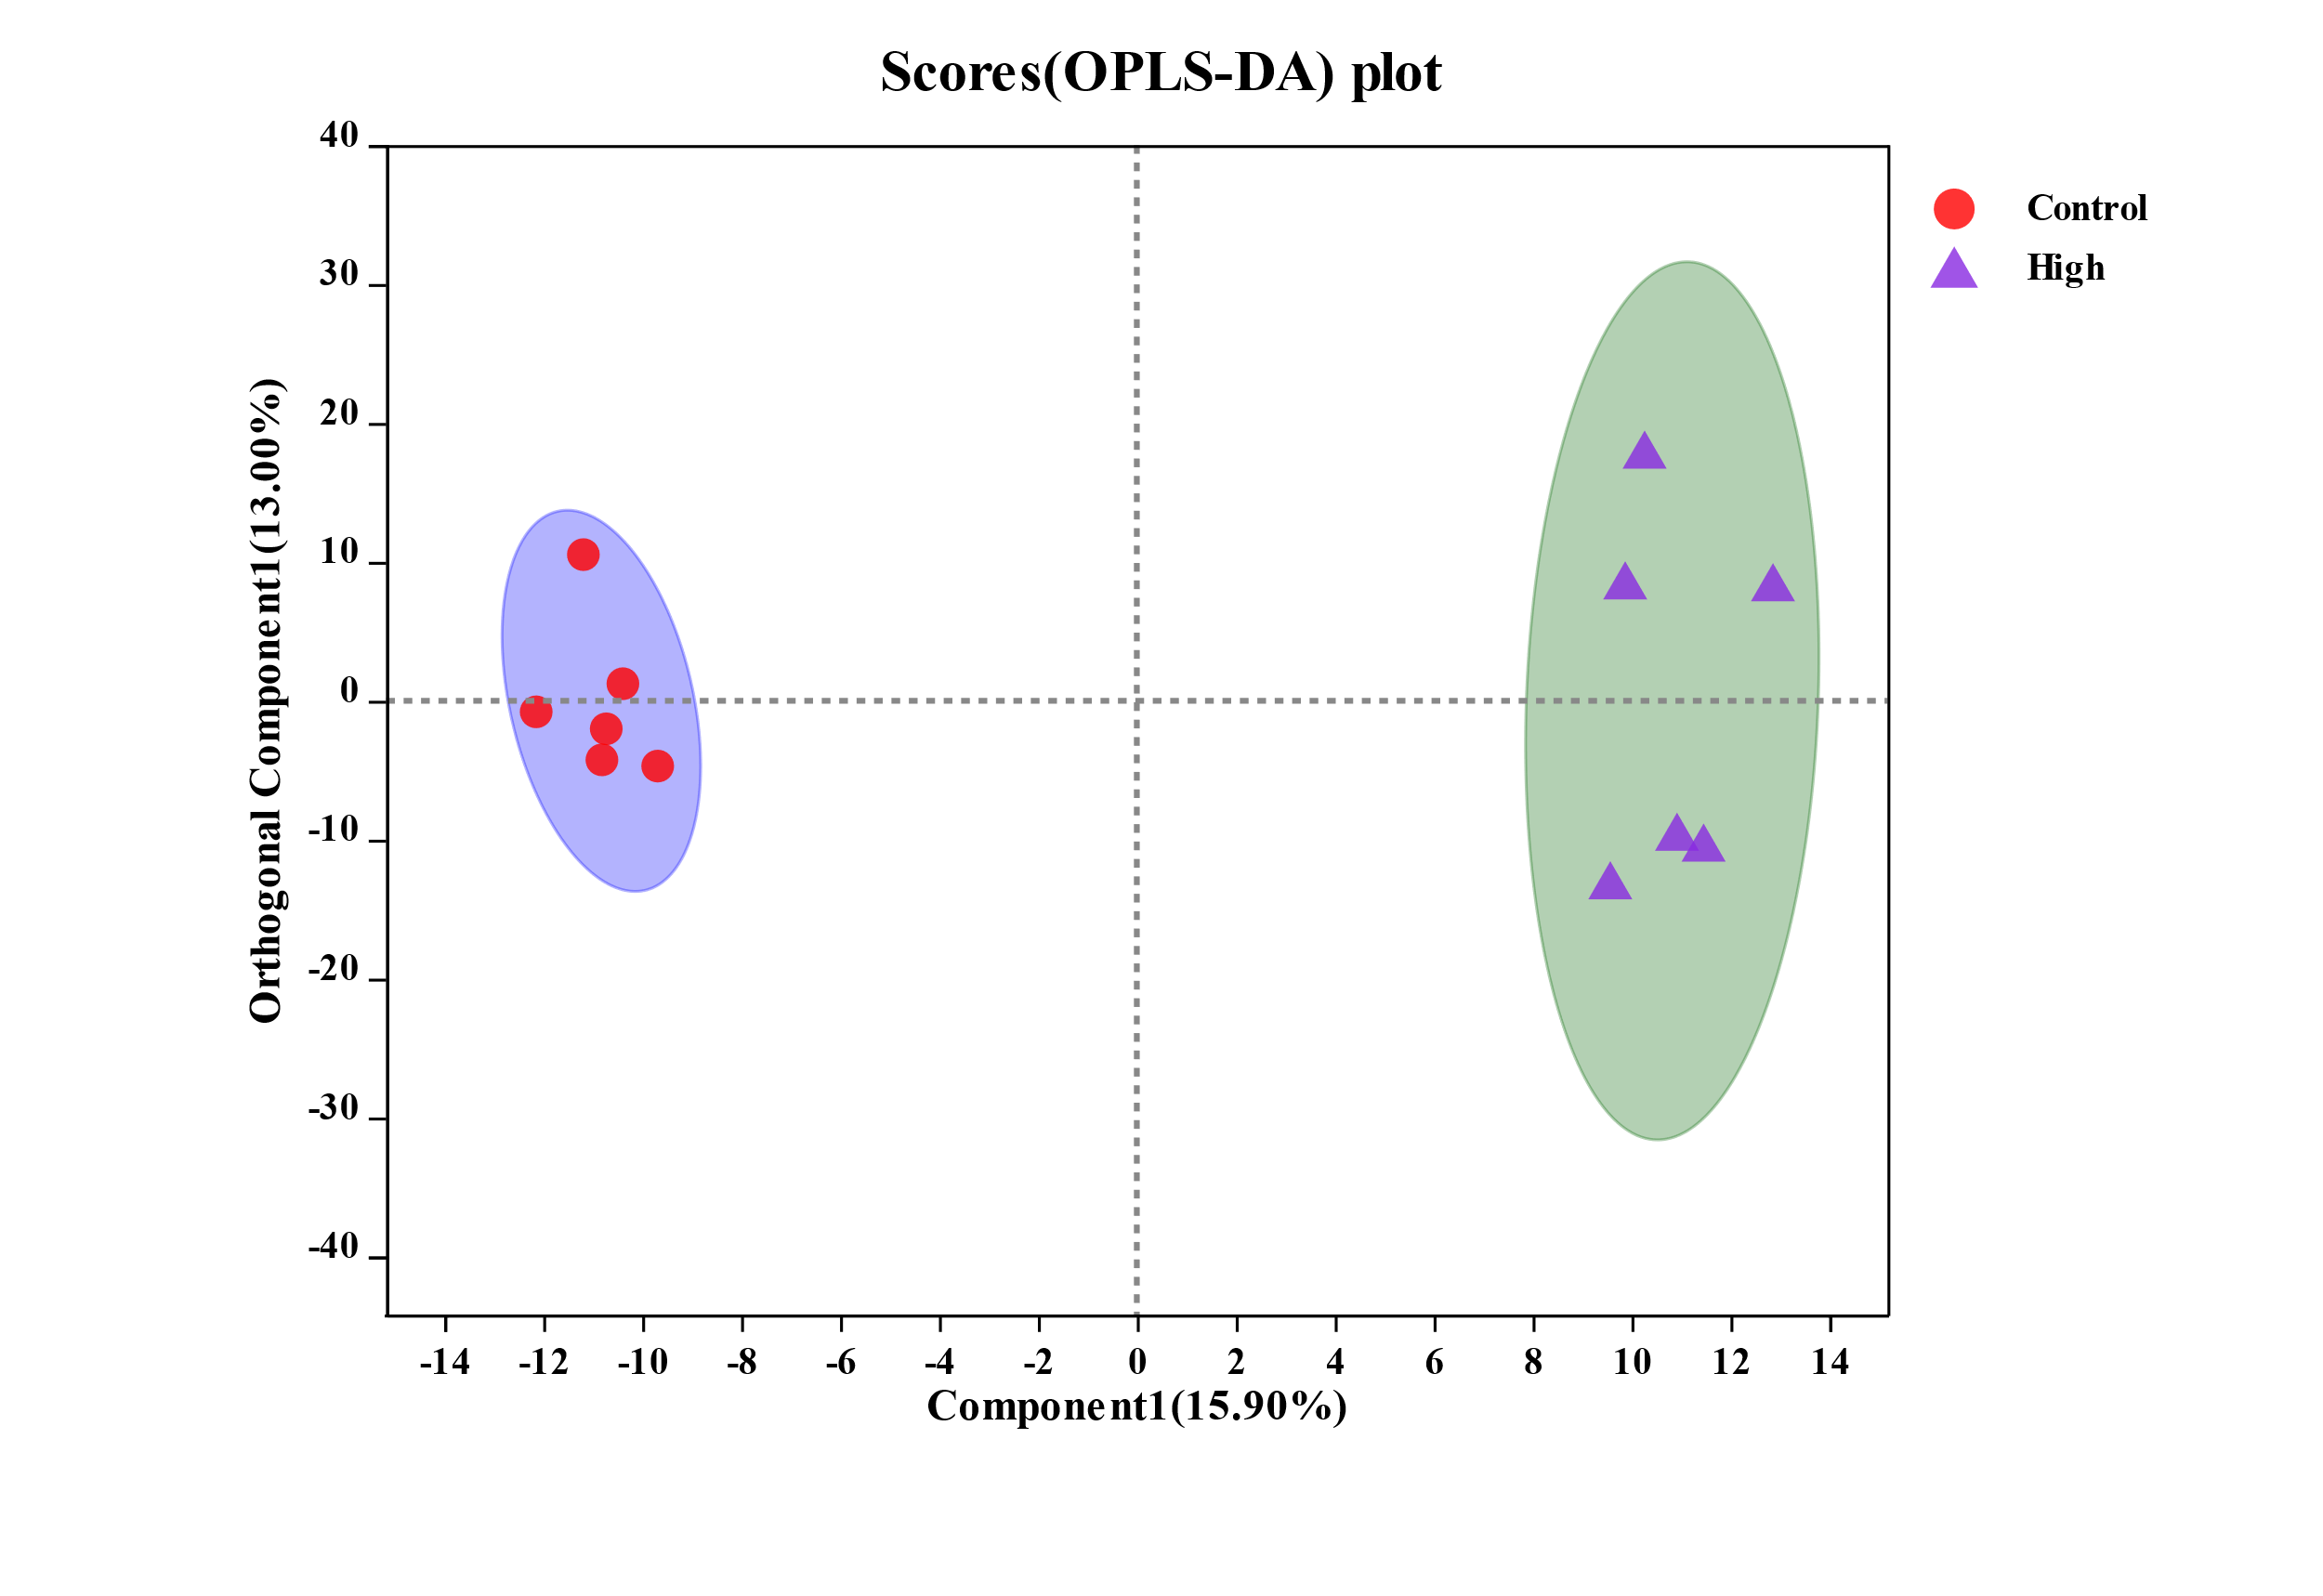


**Figure S1. Orthogonal projections to latent structures discriminant analysis (OPLS-DA) (A, B, C for negative ions, D, E, F for positive ions) scores plots of metabolites in intestines from the control and three BDE-47 treated groups.** The x-axis and y-axis represent the Component 1 and the Orthogonal component 1, respectively.
